# Supplementary material for: Combination of Irinotecan and Melatonin with the Natural Compounds Wogonin and Celastrol for Colon Cancer Treatment
Source: MDPI journal article supplement (doi:10.3390/ijms24119544), 2023-05-31
Supplement: s1 [file s1]

## Supplement 1 - Flow cytometry results.

LOVODX

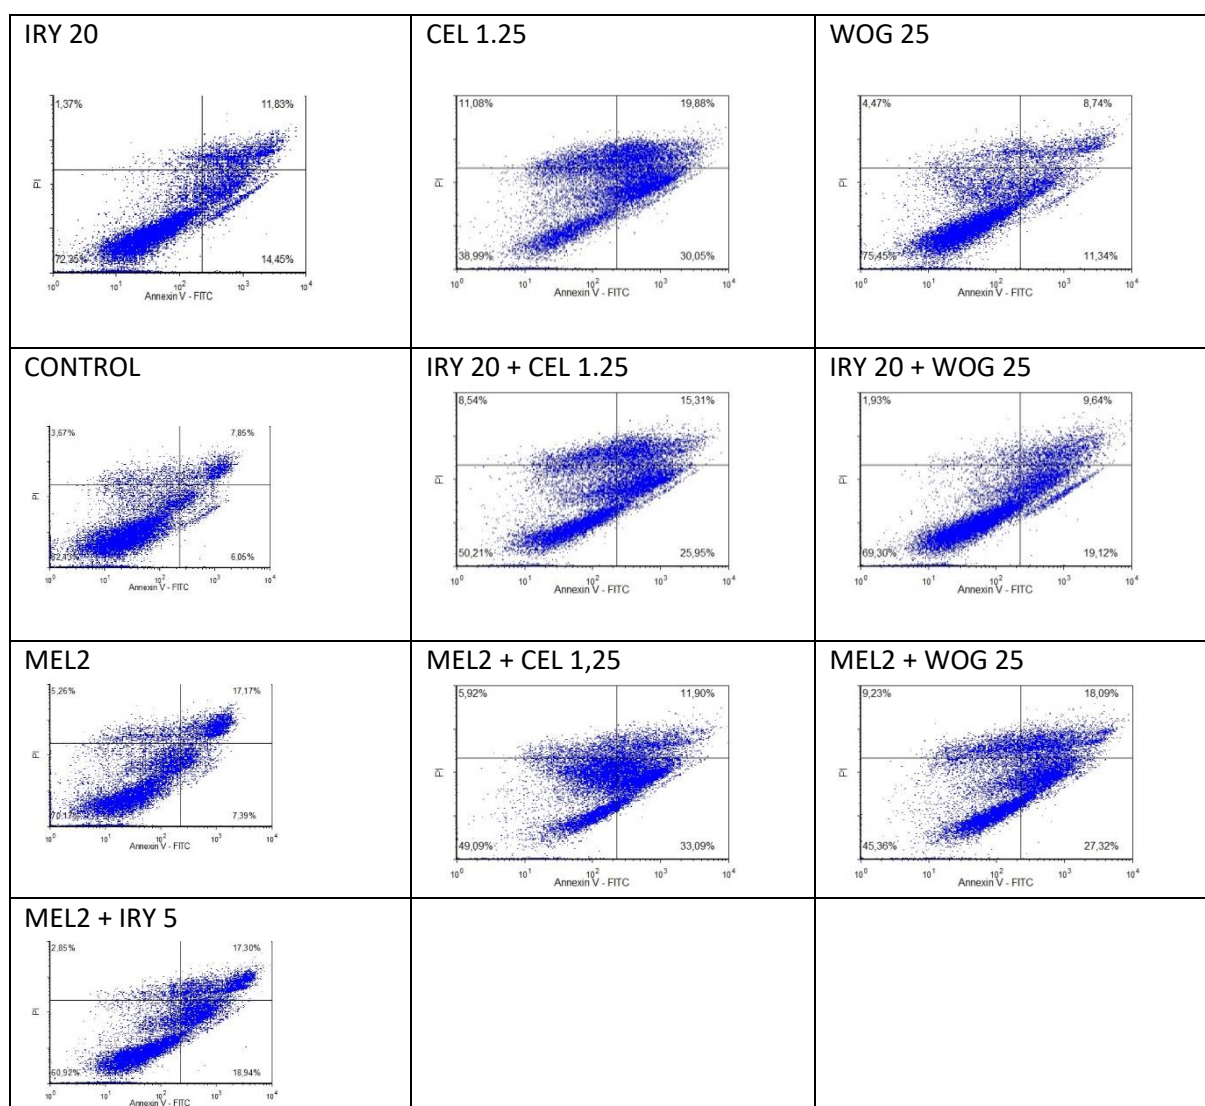

Figure 1 The representative examples of flow cytometry results for effects of 72 hours of incubation of irinotecan (5  $\mu$ M and 20  $\mu$ M), melatonin (2 mM), wogonin (25  $\mu$ M) and celastrol (1.25  $\mu$ M) with LOVO/DX cells on the frequency of apoptosis and necrosis. The cells were double stained with Annexin V- Alexa Fluor®488 and PI fluorescent dyes (Alexa Fluor® 488 Annexin V/ Dead Cell Apoptosis Kit) and analyzed by flow cytometry. The results are presented as a percentage of apoptotic cells (Annexin V- Alexa Fluor®488+ and PI- or Annexin V- Alexa Fluor®488+ and PI+) and necrotic cells (Annexin V- Alexa Fluor®488- and PI+). Abbreviations: Iry (irinotecan), Mel (melatonin), Cel (celastrol), Wog (wogonin).

## LOVO

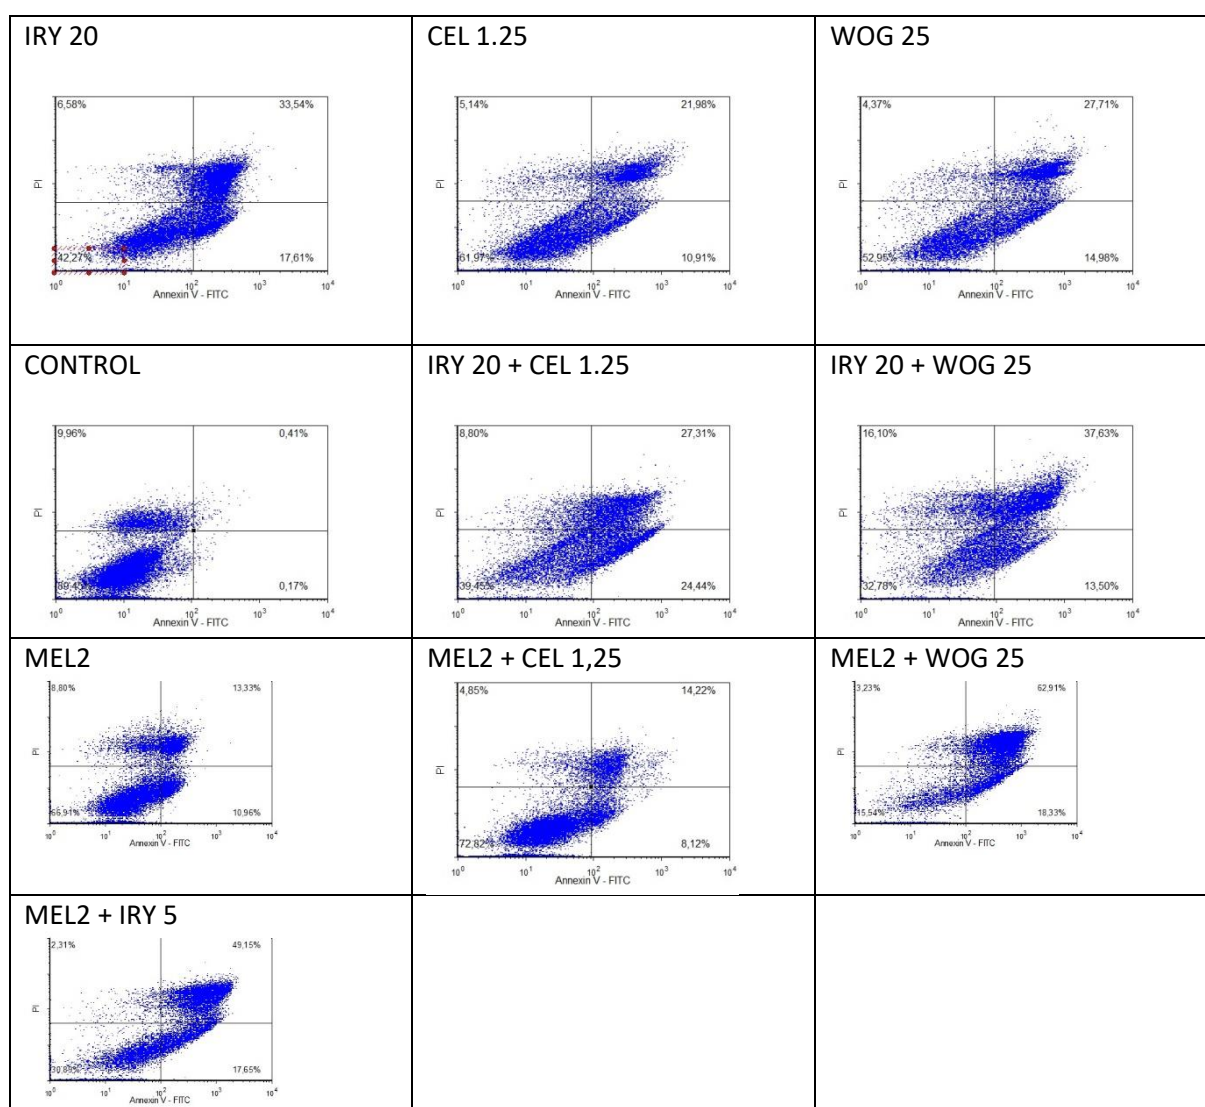

**Figure 2** The representative examples of flow cytometry results for effects of 72 hours of incubation of irinotecan (5  $\mu$ M and 20  $\mu$ M), melatonin (2 mM), wogonin (25  $\mu$ M) and celastrol (1.25  $\mu$ M) with LOVO cells on the frequency of apoptosis and necrosis. The cells were double stained with Annexin V- Alexa Fluor®488 and PI fluorescent dyes (Alexa Fluor® 488 Annexin V/ Dead Cell Apoptosis Kit) and analyzed by flow cytometry. The results are presented as a percentage of apoptotic cells (Annexin V- Alexa Fluor®488+ and PI- or Annexin V- Alexa Fluor®488+ and PI+) and necrotic cells (Annexin V- Alexa Fluor®488- and PI+). Abbreviations: Iry (irinotecan), Mel (melatonin), Cel (celastrol), Wog (wogonin).
